# Supplementary material for: Metagenome-based metabolic modelling predicts unique microbial interactions in deep-sea hydrothermal plume microbiomes
Source: PubMed Central journal article supplement (PMC10148797; doi:10.1038/s43705-023-00242-8), 2023-04-29
Supplement: 43705_2023_242_MOESM1_ESM.pdf [file 43705_2023_242_MOESM1_ESM.pdf]

1 **Metagenome-based metabolic modelling predicts unique microbial interactions in deep-**  
 2 **sea hydrothermal plume microbiomes - Supplementary Tables**

3 **Supplementary Table Legends**

|                       |                                                                                  |
|-----------------------|----------------------------------------------------------------------------------|
| Supplementary Table 1 | List of archaea present in the Guaymas microbiome                                |
| Supplementary Table 2 | List of unique contributing microbial classes in Guaymas microbiome across media |
| Supplementary Table 3 | List of unique contributors in Guaymas microbiome across media                   |

**Supplementary Table 1.** List of archaea present in the Guaymas microbiome.

| S. No | Archaea                                              |
|-------|------------------------------------------------------|
| 1     | Candidatus Nitrosopelagicus sp UWMA 0359 (CNP359)    |
| 2     | Candidatus Pacearchaeota archaeon UWMA 0287 (CPA287) |
| 3     | Marine Group II euryarchaeote UWMA 0266 (MGII266)    |
| 4     | Marine Group II euryarchaeote UWMA 0275 (MGII275)    |
| 5     | Marine Group II euryarchaeote UWMA 0279 (MGII279)    |
| 6     | Marine Group II euryarchaeote UWMA 0283 (MGII283)    |
| 7     | Marine Group II euryarchaeote UWMA 0323 (MGII323)    |
| 8     | Marine Group II euryarchaeote UWMA 0328 (MGII328)    |
| 9     | Marine Group II euryarchaeote UWMA 0344 (MGII344)    |
| 10    | Marine Group II euryarchaeote UWMA 0350 (MGII350)    |
| 11    | Marine Group II euryarchaeote UWMA 0352 (MGII352)    |
| 12    | Marine Group II euryarchaeote UWMA 0357 (MGII357)    |
| 13    | Marine Group III euryarchaeote UWMA 0284 (MGIII284)  |
| 14    | Marine Group III euryarchaeote UWMA 0340 (MGIII340)  |
| 15    | Nitrosopumilus sp UWMA 0263 (NPUM263)                |

**Supplementary Table 2.** List of unique contributing microbial classes in Guaymas microbiome across media.

| S. No | allmedia            | GM media       | JW1 media           | Marine broth 2216   |
|-------|---------------------|----------------|---------------------|---------------------|
| 1     | Alphaproteobacteria |                | Alphaproteobacteria |                     |
| 2     |                     |                | Dehalococcoidia     |                     |
| 3     | Gammaproteobacteria |                | Gammaproteobacteria | Gammaproteobacteria |
| 4     |                     |                |                     | Nitrososphaeria     |
| 5     |                     | Planctomycetes |                     |                     |
| 6     | Poseidoniiia        | Poseidoniiia   | Poseidoniiia        | Poseidoniiia        |
| 7     |                     |                |                     | Rhodothermia        |
| 8     | UBA8108             |                | UBA8108             |                     |

**Supplementary Table 3.** List of unique contributors in Guaymas microbiome across media.

| S.No | allmedia                                 | GM media                                 | JW1 media                                | Marine broth 2216                       |
|------|------------------------------------------|------------------------------------------|------------------------------------------|-----------------------------------------|
| 1    | Planctomycetes bacterium UWMA 0276       |                                          | Planctomycetes bacterium UWMA 0276       |                                         |
| 2    | Porticocaceae bacterium UWMA 0313        |                                          | Porticocaceae bacterium UWMA 0313        |                                         |
| 3    | Sulfitobacter sp UWMA 0305               |                                          | Sulfitobacter sp UWMA 0305               |                                         |
| 4    | Methylococaceae bacterium UWMA 0325      |                                          | Methylococaceae bacterium UWMA 0325      |                                         |
| 5    | Marine Group II euryarchaeote UWMA 0352  |                                          | Marine Group II euryarchaeote UWMA 0352  | Marine Group II euryarchaeote UWMA 0352 |
| 6    | Marine Group III euryarchaeote UWMA 0284 | Marine Group III euryarchaeote UWMA 0284 | Marine Group III euryarchaeote UWMA 0284 |                                         |
| 7    |                                          |                                          | Dehalococcoidia bacterium UWMA 0267      |                                         |
| 8    |                                          |                                          |                                          | Nitrosopumilus sp UWMA 0263             |
| 9    |                                          |                                          |                                          | Bacteroidetes bacterium UWMA 0293       |
| 10   |                                          |                                          |                                          | Gammaproteobacteria bacterium UWMA 0299 |
